# Supplementary material
Source: PubMed Central journal article supplement (PMC5477616)
Supplement: 2015_131227-Disclosures_and_Contributions.pdf [file 2015_131227-Disclosures_and_Contributions.pdf]

Haematologica  
HAEMATOL/2015/131227  
Version 3

Prostacyclin-analog therapy in sickle cell pulmonary hypertension

Nargues A. Weir, Rehan Saiyed, Shoaib Alam, Anna Conrey,  
Himanshu D. Desai, M. Patricia George, Jennifer H. Keeley, Elizabeth  
S. Klings, Alem Mehari, James G. Taylor, Caterina P. Minniti, and  
Gregory J. Kato

Disclosures: Funding was provided by the National Heart, Lung and Blood Institute Division of Intramural Research (1 ZIA HL006014-04).

Contributions: RS, AC, HD, MPG, JK, EK , JGT , SA , CM , NAW , GJK and AM contributed to the collection of data. RS and GJK contributed to the statistical analysis. NAW, RS and GJK drafted the manuscript. All authors contributed to the editing of the manuscript.
